# Supplementary material for: Metabolic Profiling of Sugars and Organic Acids, and Expression Analyses of Metabolism-Associated Genes in Two Yellow-Peel Pitaya Species
Source: MDPI journal article supplement (doi:10.3390/plants11050694), 2022-03-04
Supplement: s1 [file s1]

## Supplementary figures and tables

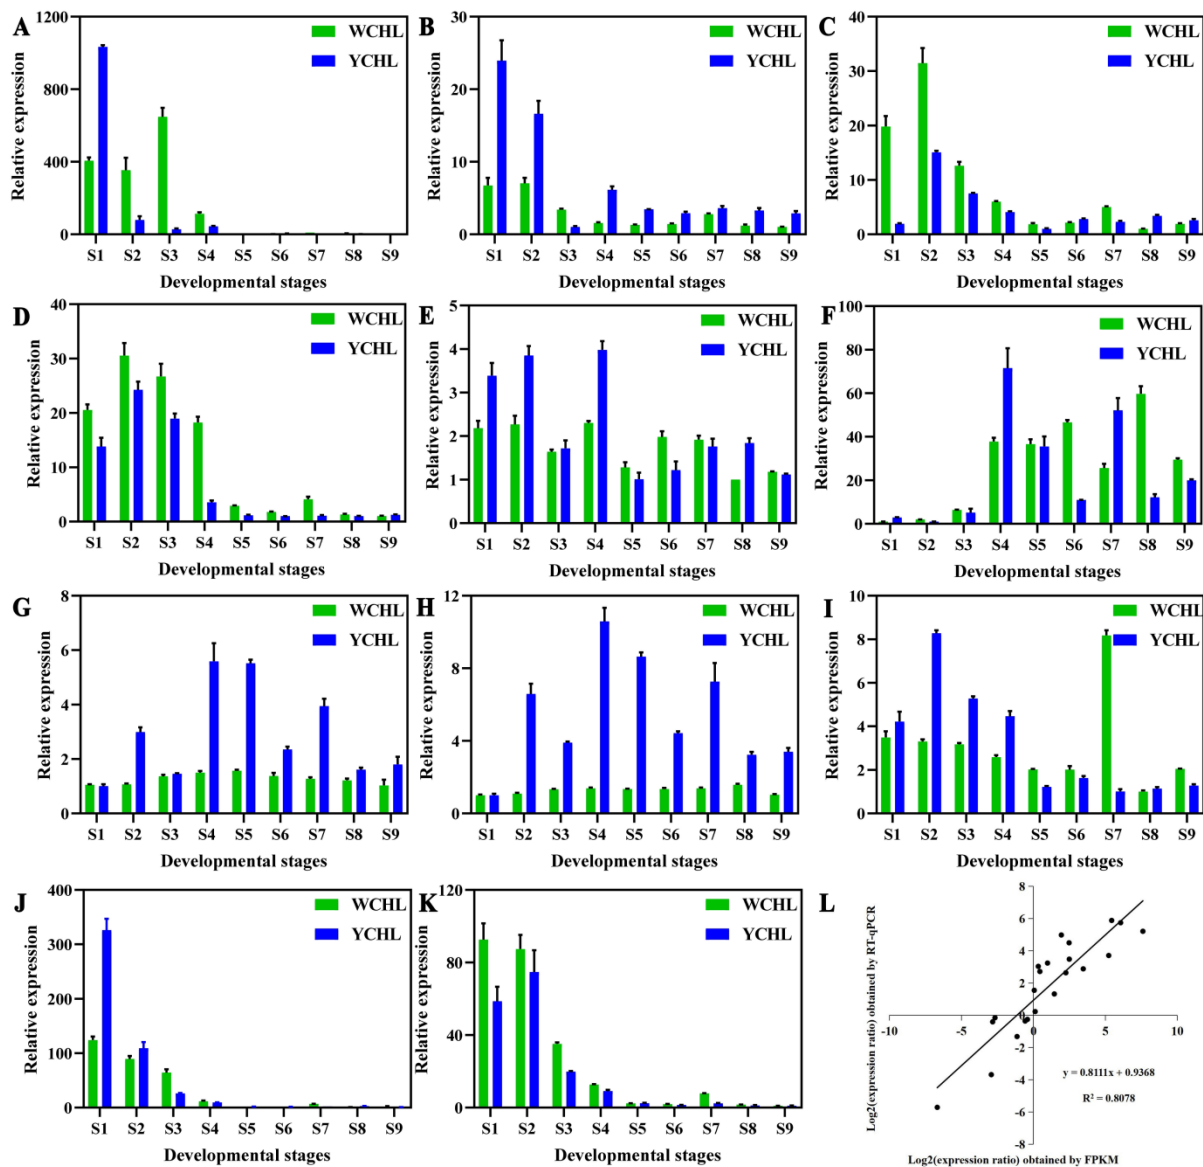

Figure S1. The RT-qPCR analyses of eleven candidate genes (A-K) in sugar and acid metabolic pathway and the coefficient analyses between FPKM values and RT-qPCR of those genes (L). A, *CMS1*; B, *CS6*; C, *FRK5*; D, *FRK9*; E, *MDAR1*; F, *PEPC4*; G, *PHS2*; H, *PHS3*; I, *PM11*; J, *SuSy5*; K, *SuSy11*.

Table S1 RNA-Seq data and corresponding quality control information

| Samples    | Raw reads | Clean reads | Clean_bases<br>(G) | Error rate<br>(%) | Q20<br>(%) | Q30<br>(%) | GC content<br>(%) |
|------------|-----------|-------------|--------------------|-------------------|------------|------------|-------------------|
| WCHL_17d_1 | 45918120  | 44088506    | 6.61               | 0.02              | 98.14      | 94.31      | 49.64             |
| WCHL_17d_2 | 48264390  | 46108368    | 6.92               | 0.03              | 97.95      | 93.94      | 50.04             |
| WCHL_17d_3 | 40405646  | 38763342    | 5.81               | 0.03              | 97.95      | 93.93      | 49.75             |
| WCHL_25d_1 | 42257762  | 40626122    | 6.09               | 0.02              | 98.22      | 94.51      | 50.66             |
| WCHL_25d_2 | 48071026  | 46752758    | 7.01               | 0.02              | 98.85      | 96.09      | 50.57             |
| WCHL_25d_3 | 43826692  | 40976414    | 6.15               | 0.02              | 98.22      | 94.67      | 49.99             |
| WCHL_29d_1 | 45988084  | 42674020    | 6.4                | 0.02              | 98.14      | 94.46      | 50.01             |
| WCHL_29d_2 | 47180636  | 45564148    | 6.83               | 0.02              | 98.86      | 96.14      | 50.4              |
| WCHL_29d_3 | 46150874  | 41831586    | 6.27               | 0.02              | 98.19      | 94.58      | 50.26             |
| YCHL_35d_1 | 41089912  | 39661570    | 5.95               | 0.02              | 98.12      | 94.28      | 49.27             |
| YCHL_35d_2 | 45494498  | 44206436    | 6.63               | 0.03              | 97.98      | 93.88      | 49.94             |
| YCHL_35d_3 | 45244634  | 43577446    | 6.54               | 0.02              | 98.08      | 94.15      | 51.38             |
| YCHL_65d_1 | 45518136  | 41775096    | 6.27               | 0.02              | 98.33      | 94.9       | 51.09             |
| YCHL_65d_2 | 47612182  | 45114430    | 6.77               | 0.02              | 98.32      | 94.9       | 50.43             |
| YCHL_65d_3 | 50410912  | 48703300    | 7.31               | 0.02              | 98.62      | 95.45      | 49.99             |
| YCHL_75d_1 | 45291970  | 44124280    | 6.62               | 0.02              | 98.84      | 96.02      | 50.7              |
| YCHL_75d_2 | 45216534  | 43936170    | 6.59               | 0.02              | 98.81      | 96         | 50.28             |
| YCHL_75d_3 | 44770172  | 42611336    | 6.39               | 0.03              | 98.06      | 94.06      | 50.47             |

Table S2 Specific primers used in RT-qPCR assay.

| Gene name     | Forward primer (5' to 3') | Reverse primer (5' to 3') |
|---------------|---------------------------|---------------------------|
| <i>CMS1</i>   | GTATGAACTTGATGGGCTT       | TGGTATTGTGCTTGGAAAA       |
| <i>CS6</i>    | CAGTGGAACATGTGCAAGGC      | CTGCTTCCCTGAGTGCTTGA      |
| <i>FRK5</i>   | TGCTGGCGATGCATTTGTTG      | CCGGGAATTGCACCTCTCTT      |
| <i>FRK9</i>   | GAGGACGAGCCGAGATTGAG      | GCTGGGATTGCTCCCTTCTT      |
| <i>MDAR1</i>  | TGGTCTTGAGCTCAGTGCAG      | ATCAGCGGTGAAGAGTCGTG      |
| <i>PEPC4</i>  | CGTGCTCGAGTAGACGAACT      | AGCACGTTCACGGGTATTGT      |
| <i>PHS2</i>   | TGAATCCCCCGAGTCCAGAT      | GGAAAATCCCTCTGGGGCAA      |
| <i>PHS3</i>   | GCGGAGTGTTTGGCACATTT      | ACCACGGCCAAATCCTTCAT      |
| <i>PMI1</i>   | GCTGGCCTAACACCTAAGCA      | TGTGCATCCATCACTGCCAT      |
| <i>SuSy5</i>  | GTGAACCTTGTCGTGGTTGC      | ATCTGGGCAGAGATCCACCT      |
| <i>SuSy11</i> | GGAGCTGGACTTTGAGCCAT      | TGTTGAGGAACTCGACACCG      |

Table S3 The transcript abundance of genes related to ascorbate pathways in ‘WCHL’ and ‘YCHL’ pitayas pulps.

| Gene names             | Gene ID      | ‘WCHL’ pitaya |       |       | ‘YCHL’ pitaya |       |       |
|------------------------|--------------|---------------|-------|-------|---------------|-------|-------|
|                        |              | 17 d          | 25 d  | 29 d  | 35 d          | 65 d  | 75 d  |
| L-ascorbate oxidase    |              |               |       |       |               |       |       |
| AO1                    | HU01G01245.1 | 0             | 0     | 0     | 0             | 0     | 0     |
| AO2                    | HU01G01270.1 | 0             | 0     | 0     | 5.44          | 0     | 0     |
| AO3                    | HU01G01464.1 | 8.69          | 0     | 0     | 6.17          | 0.77  | 2.43  |
| AO4                    | HU01G01815.1 | 0             | 0     | 0     | 0             | 0     | 0     |
| AO5                    | HU02G01327.1 | 3.25          | 11.34 | 32.22 | 7.84          | 2.36  | 4.77  |
| AO6                    | HU02G02455.1 | 0             | 0     | 0     | 0             | 0     | 0     |
| AO7                    | HU02G03061.1 | 0             | 0     | 0     | 0             | 0     | 0     |
| AO8                    | HU03G01567.1 | 0             | 0     | 0     | 0             | 0     | 0     |
| AO9                    | HU03G01573.1 | 0             | 0     | 0     | 0             | 0     | 0     |
| AO10                   | HU05G01813.1 | 0             | 0     | 0     | 0             | 0     | 0     |
| AO11                   | HU05G01868.1 | 0.2           | 0     | 0     | 0             | 0     | 0     |
| AO12                   | HU06G00762.1 | 21.26         | 1.59  | 4.01  | 70.48         | 7.37  | 8.26  |
| AO13                   | HU06G00824.1 | 0             | 0     | 0     | 0             | 0     | 0     |
| AO14                   | HU06G00825.1 | 3.45          | 1.48  | 4.27  | 1.67          | 1.6   | 6.9   |
| AO15                   | HU07G01170.1 | 1.92          | 0.42  | 0.61  | 1.62          | 1.54  | 0.35  |
| AO16                   | HU08G00550.1 | 3.53          | 5.73  | 4.62  | 3.04          | 7.24  | 7.32  |
| AO17                   | HU08G01290.1 | 0.08          | 0     | 0     | 0             | 0     | 0     |
| AO18                   | HU08G01291.1 | 0.95          | 0     | 0     | 0             | 0.07  | 0     |
| AO19                   | HU08G01953.1 | 0.96          | 0.17  | 0.04  | 0.46          | 0.2   | 0.18  |
| AO20                   | HU09G01170.1 | 0             | 0     | 0     | 0             | 0     | 0     |
| AO21                   | HU09G01171.1 | 0             | 0     | 0     | 0             | 0     | 0     |
| AO22                   | HU10G01971.1 | 0             | 0     | 0     | 0             | 0     | 0     |
| L-ascorbate peroxidase |              |               |       |       |               |       |       |
| APX1                   | HU01G00039.1 | 74.57         | 46.68 | 47.18 | 82.93         | 94.49 | 90.73 |

|                                         |                     |        |       |        |        |        |        |
|-----------------------------------------|---------------------|--------|-------|--------|--------|--------|--------|
| <i>APX2</i>                             | <i>HU01G01291.1</i> | 272.97 | 461.8 | 401.56 | 582.28 | 485.69 | 468.56 |
| <i>APX3</i>                             | <i>HU03G00392.1</i> | 12.78  | 15.52 | 17.58  | 8.22   | 5.85   | 4.39   |
| <i>APX4</i>                             | <i>HU06G00143.1</i> | 0.13   | 0     | 0      | 0      | 0      | 0      |
| <i>APX5</i>                             | <i>HU06G00147.1</i> | 0      | 0     | 0      | 0      | 0      | 0      |
| <i>APX6</i>                             | <i>HU06G00148.1</i> | 0      | 0     | 0      | 0      | 0      | 0      |
| <i>APX7</i>                             | <i>HU06G01014.1</i> | 0.13   | 0.56  | 0.25   | 1.42   | 0.92   | 0      |
| <i>APX8</i>                             | <i>HU07G00395.1</i> | 1.61   | 1.53  | 1.41   | 1.28   | 2.6    | 2.14   |
| <i>APX9</i>                             | <i>HU07G00844.1</i> | 44.61  | 12.07 | 26.05  | 71.03  | 56.49  | 52.29  |
| <i>APX10</i>                            | <i>HU09G00808.1</i> | 31.33  | 89.6  | 30.18  | 9.96   | 63.5   | 90.36  |
| <i>APX11</i>                            | <i>HU11G00172.1</i> | 7.61   | 13.25 | 20.95  | 4.32   | 8.33   | 10.14  |
| <i>APX12</i>                            | <i>HU11G01184.1</i> | 10.57  | 16.62 | 22.54  | 14.95  | 23.02  | 26.83  |
| dehydroascorbate reductase              |                     |        |       |        |        |        |        |
| <i>DHAR</i>                             | <i>HU06G01275.1</i> | 102.27 | 65.84 | 32.58  | 16.54  | 9.7    | 13     |
| L-galactose dehydrogenase               |                     |        |       |        |        |        |        |
| <i>GDH</i>                              | <i>HU03G00469.1</i> | 24.04  | 12.52 | 13.43  | 13.47  | 10.16  | 8.41   |
| GDP-L-galactose phosphorylase           |                     |        |       |        |        |        |        |
| <i>GGP1</i>                             | <i>HU01G01690.1</i> | 41.04  | 20.95 | 48.5   | 35.26  | 36.66  | 63.54  |
| <i>GGP2</i>                             | <i>HU05G01762.1</i> | 28.5   | 21.94 | 32.63  | 87.65  | 32.66  | 33.4   |
| <i>GGP3</i>                             | <i>HU08G00238.1</i> | 69.97  | 42.44 | 40     | 36.62  | 17.32  | 17.65  |
| L-galactono-1,4-lactone dehydrogenase   |                     |        |       |        |        |        |        |
| <i>GLDH</i>                             | <i>HU10G01073.1</i> | 11.24  | 12.57 | 19.61  | 10.46  | 18.74  | 16.38  |
| GDP-mannose 3,5-epimerase               |                     |        |       |        |        |        |        |
| <i>GME1</i>                             | <i>HU03G01059.1</i> | 25.03  | 15.77 | 23.54  | 10.66  | 19.54  | 20     |
| <i>GME2</i>                             | <i>HU08G01094.1</i> | 71.84  | 44.86 | 37.8   | 54.27  | 43.83  | 36.27  |
| Mannose-1-phosphate guanylyltransferase |                     |        |       |        |        |        |        |
| <i>GMP1</i>                             | <i>HU05G01570.1</i> | 11.46  | 10.73 | 11.32  | 7.84   | 4.77   | 8.47   |
| <i>GMP2</i>                             | <i>HU05G01571.1</i> | 8.69   | 5.98  | 5.95   | 2.59   | 5.88   | 9.27   |
| <i>GMP3</i>                             | <i>HU05G01623.1</i> | 10.73  | 7.09  | 3.47   | 11.19  | 9.49   | 8.02   |
| <i>GMP4</i>                             | <i>HU06G00539.1</i> | 56.89  | 26.42 | 26.47  | 70.57  | 63.34  | 55.22  |
| L-galactose-1-phosphate phosphatase     |                     |        |       |        |        |        |        |

|                                       |                     |        |        |        |        |        |        |
|---------------------------------------|---------------------|--------|--------|--------|--------|--------|--------|
| <i>GPP1</i>                           | <i>HU01G00275.1</i> | 13.31  | 19.77  | 11.13  | 8.38   | 5.54   | 7.14   |
| <i>GPP2</i>                           | <i>HU01G02287.1</i> | 13.25  | 8.34   | 8.19   | 8.7    | 5.94   | 8.13   |
| <i>GPP3</i>                           | <i>HU02G02148.1</i> | 19.08  | 9.6    | 8.81   | 13.62  | 11.31  | 13.3   |
| <i>GPP4</i>                           | <i>HU10G01800.1</i> | 0.08   | 0      | 0.28   | 0      | 0      | 0      |
| <i>GPP5</i>                           | <i>HU10G01801.1</i> | 0.11   | 0      | 0.17   | 0.4    | 0.16   | 0      |
| <i>GPP6</i>                           | <i>HU10G01803.1</i> | 2.41   | 1.91   | 2.1    | 2.97   | 1.56   | 2.94   |
| <i>GPP7</i>                           | <i>HU10G02033.1</i> | 103.78 | 42.02  | 57.55  | 132.68 | 129.92 | 106.29 |
| <b>Monodehydroascorbate reductase</b> |                     |        |        |        |        |        |        |
| <i>MDAR1</i>                          | <i>HU02G02424.1</i> | 10.25  | 9.6    | 9.42   | 39.76  | 47.38  | 38.15  |
| <i>MDAR2</i>                          | <i>HU05G00113.1</i> | 38.84  | 79.42  | 74.26  | 25.12  | 49.93  | 40.96  |
| <i>MDAR3</i>                          | <i>HU09G00954.1</i> | 200.19 | 239.18 | 126.62 | 263.93 | 194.2  | 237.34 |
| <b>Mannose-6-phosphate isomerase</b>  |                     |        |        |        |        |        |        |
| <i>PMI1</i>                           | <i>HU05G01684.1</i> | 14.47  | 21.35  | 31.8   | 9.15   | 6.5    | 7.23   |
| <i>PMI2</i>                           | <i>HU05G01685.1</i> | 0.06   | 8.58   | 1.19   | 0      | 0.5    | 1.18   |
| <i>PMI3</i>                           | <i>HU06G00668.1</i> | 13.9   | 33.02  | 27.09  | 4.03   | 11.9   | 7.27   |
| <b>Phosphomannomutase</b>             |                     |        |        |        |        |        |        |
| <i>PMM1</i>                           | <i>HU07G00464.1</i> | 13.77  | 3.11   | 5.42   | 25.14  | 9.71   | 11     |
| <i>PMM2</i>                           | <i>HU09G00757.1</i> | 29.33  | 47.97  | 35.85  | 14.85  | 32.63  | 38.5   |

---

Table S4 Correlation analyses between the ascorbic acid contents and expression patterns of candidate genes in ‘WCHL’ and ‘YCHL’ pitayas.

| Gene names   | Gene ID             | ascorbic acid |
|--------------|---------------------|---------------|
| <i>AO5</i>   | <i>HU02G01327.1</i> | 0.4           |
| <i>AO12</i>  | <i>HU06G00762.1</i> | -0.311        |
| <i>APX1</i>  | <i>HU01G00039.1</i> | -0.751**      |
| <i>APX2</i>  | <i>HU01G01291.1</i> | -0.294        |
| <i>APX9</i>  | <i>HU07G00844.1</i> | -0.676**      |
| <i>APX10</i> | <i>HU09G00808.1</i> | -0.021        |
| <i>DHAR</i>  | <i>HU06G01275.1</i> | 0.391         |
| <i>GDH</i>   | <i>HU03G00469.1</i> | 0.266         |
| <i>GGP1</i>  | <i>HU01G01690.1</i> | -0.006        |
| <i>GGP2</i>  | <i>HU05G01762.1</i> | -0.036        |
| <i>GGP3</i>  | <i>HU08G00238.1</i> | 0.404         |
| <i>GLDH</i>  | <i>HU10G01073.1</i> | 0.153         |
| <i>GME1</i>  | <i>HU03G01059.1</i> | 0.429         |
| <i>GME2</i>  | <i>HU08G01094.1</i> | -0.084        |
| <i>GMP1</i>  | <i>HU05G01570.1</i> | 0.132         |
| <i>GMP2</i>  | <i>HU05G01571.1</i> | 0.128         |
| <i>GMP3</i>  | <i>HU05G01623.1</i> | -0.497*       |
| <i>GMP4</i>  | <i>HU06G00539.1</i> | -0.603**      |
| <i>GPP7</i>  | <i>HU10G02033.1</i> | -0.366        |
| <i>MDAR1</i> | <i>HU02G02424.1</i> | -0.531*       |
| <i>MDAR2</i> | <i>HU05G00113.1</i> | 0.669**       |
| <i>MDAR3</i> | <i>HU09G00954.1</i> | -0.368        |
| <i>PMI1</i>  | <i>HU05G01684.1</i> | 0.687**       |
| <i>PMI2</i>  | <i>HU05G01685.1</i> | 0.358         |
| <i>PMI3</i>  | <i>HU06G00668.1</i> | 0.761**       |
| <i>PMM1</i>  | <i>HU07G00464.1</i> | -0.577*       |
| <i>PMM2</i>  | <i>HU09G00757.1</i> | 0.388         |

Note: The data was analyzed using SPSS 25 with Pearson's correlation. The significant positive correlation coefficients are indicated in red values while negative correlation coefficients are indicated in blue values.

\* indicates correlation significant at the 0.05 level ( $p < 0.05$ , two-tailed) while \*\* indicates correlation significant at the 0.01 level ( $p < 0.01$ , two-tailed).

Table S5 The transcript abundance of genes related to starch synthesis and degradation pathways in ‘WCHL’ and ‘YCHL’ pitayas.

| Gene names                              | Gene ID      | ‘WCHL’ pitaya |        |       | ‘YCHL’ pitaya |        |        |
|-----------------------------------------|--------------|---------------|--------|-------|---------------|--------|--------|
|                                         |              | 17 d          | 25 d   | 29 d  | 35 d          | 65 d   | 75 d   |
| Alpha-glucosidase                       |              |               |        |       |               |        |        |
| AGL1                                    | HU02G01725.1 | 1.02          | 0.67   | 0.33  | 2.96          | 3.66   | 4.94   |
| AGL2                                    | HU02G01726.1 | 1.13          | 1.04   | 0.73  | 5.49          | 6.44   | 6.1    |
| AGL3                                    | HU02G01727.1 | 8.19          | 5      | 6.53  | 7.22          | 5.14   | 7.53   |
| AGL4                                    | HU02G01728.1 | 1.19          | 0.65   | 0.48  | 0             | 0      | 0      |
| AGL5                                    | HU02G01729.1 | 0.91          | 0.2    | 0.78  | 0.54          | 1.74   | 3.44   |
| AGL6                                    | HU02G01730.1 | 6.93          | 4.74   | 7.04  | 2.39          | 1.26   | 1.81   |
| AGL7                                    | HU03G01386.1 | 23.77         | 26.53  | 26.47 | 16.25         | 21.31  | 16.17  |
| AGL8                                    | HU05G00176.1 | 53.86         | 68.41  | 44.28 | 18.17         | 55.74  | 53.64  |
| AGL9                                    | HU09G01939.1 | 4.59          | 12.68  | 5.42  | 0.81          | 1.53   | 1.24   |
| Glucose-1-phosphate adenylyltransferase |              |               |        |       |               |        |        |
| AGPS1                                   | HU01G00286.1 | 14.46         | 24.98  | 22.71 | 25.52         | 79.08  | 66.24  |
| AGPS2                                   | HU03G00147.1 | 52.25         | 10.01  | 14.58 | 123.15        | 28.2   | 18.17  |
| AGPS3                                   | HU03G02063.1 | 63.03         | 14.95  | 12.89 | 50.09         | 68.08  | 76.34  |
| AGPS4                                   | HU06G01322.1 | 0.45          | 0.06   | 0     | 0             | 0.19   | 0.21   |
| AGPS5                                   | HU07G00703.1 | 26.56         | 1.87   | 0.77  | 7.01          | 5.8    | 3.57   |
| Alpha-amylase                           |              |               |        |       |               |        |        |
| AMY1                                    | HU01G00458.1 | 0.55          | 0.8    | 3.03  | 2.52          | 3.16   | 1.68   |
| AMY2                                    | HU01G01364.1 | 4.48          | 6.89   | 13.06 | 1.95          | 3.58   | 4.03   |
| AMY3                                    | HU01G02422.1 | 0.76          | 0.7    | 1.68  | 0.35          | 0.92   | 0.53   |
| AMY4                                    | HU01G02675.1 | 1.19          | 2      | 3.19  | 1.23          | 2.69   | 3.39   |
| AMY5                                    | HU02G00188.1 | 1.99          | 2.4    | 4.39  | 1.33          | 2.44   | 4.13   |
| AMY6                                    | HU02G00293.1 | 38.78         | 210.71 | 76.22 | 20.37         | 220.68 | 194.78 |
| AMY7                                    | HU02G01323.1 | 23.59         | 97.01  | 74.82 | 10.59         | 53.44  | 64.52  |
| AMY8                                    | HU02G02922.1 | 1.6           | 1.74   | 2.69  | 1.27          | 1.04   | 2.24   |



|       |              |       |      |      |       |       |       |
|-------|--------------|-------|------|------|-------|-------|-------|
| AMY9  | HU02G03420.1 | 0.62  | 1.16 | 1.63 | 1.11  | 2.11  | 2.88  |
| AMY10 | HU03G01593.1 | 0.72  | 0.88 | 2.42 | 0.27  | 0.98  | 1.3   |
| AMY11 | HU04G00245.1 | 0.35  | 0.86 | 1.83 | 1.27  | 1.38  | 1.09  |
| AMY12 | HU05G00001.1 | 0     | 0.06 | 0    | 0     | 0     | 0     |
| AMY13 | HU05G00002.1 | 0     | 0    | 0    | 0     | 0     | 0     |
| AMY14 | HU05G01323.1 | 3.9   | 4.3  | 5.25 | 8.14  | 1.16  | 1.45  |
| AMY15 | HU05G01802.1 | 0.34  | 0.99 | 2.79 | 0.29  | 1.18  | 1.21  |
| AMY16 | HU06G00016.1 | 0.21  | 0    | 0    | 0     | 0     | 0     |
| AMY17 | HU06G00973.1 | 0     | 0    | 0    | 0     | 0     | 0     |
| AMY18 | HU06G01277.1 | 1.76  | 3.12 | 3.43 | 0.9   | 2.48  | 2.54  |
| AMY19 | HU07G00472.1 | 1.25  | 1.65 | 3.12 | 1.98  | 1.45  | 0.68  |
| AMY20 | HU07G00886.1 | 0.68  | 1.05 | 4.06 | 0.54  | 1.53  | 1.63  |
| AMY21 | HU07G00912.1 | 0     | 0.09 | 0.15 | 0.06  | 0.04  | 0.04  |
| AMY22 | HU07G00913.1 | 0.14  | 0.56 | 0.42 | 0.2   | 0.57  | 1.16  |
| AMY23 | HU07G01462.1 | 0     | 0    | 0    | 0     | 0     | 0     |
| AMY24 | HU07G01511.1 | 55.71 | 0.24 | 0.09 | 12.41 | 0     | 0     |
| AMY25 | HU08G00353.1 | 0.12  | 0    | 0    | 0     | 0     | 0     |
| AMY26 | HU08G00466.1 | 2.22  | 3.97 | 10.3 | 2.68  | 14.69 | 12.55 |
| AMY27 | HU08G00990.1 | 0.56  | 0.68 | 2.55 | 2.68  | 3.84  | 4.42  |
| AMY28 | HU08G01940.1 | 0.49  | 1.01 | 2.44 | 1.35  | 0.5   | 1.39  |
| AMY29 | HU09G01705.1 | 0.51  | 0.42 | 1.27 | 0.2   | 0.32  | 0.22  |
| AMY30 | HU10G00319.1 | 0.68  | 0.07 | 0.07 | 0.2   | 0.07  | 0     |
| AMY31 | HU10G01279.1 | 0.13  | 0.18 | 0.22 | 1.17  | 2.01  | 2.14  |
| AMY32 | HU11G00819.1 | 0.43  | 1.78 | 3.17 | 0.81  | 1.01  | 1.3   |
| AMY33 | HU11G01508.1 | 0.17  | 1.22 | 0.23 | 0     | 0     | 0.34  |
| AMY34 | HU11G01790.1 | 1.8   | 2.36 | 7.11 | 1.62  | 2.26  | 2.37  |

#### Beta-amylase

|      |              |      |      |     |      |   |   |
|------|--------------|------|------|-----|------|---|---|
| BAM1 | HU03G02052.1 | 2.13 | 0.56 | 0.2 | 3.58 | 0 | 0 |
|------|--------------|------|------|-----|------|---|---|

|              |                     |        |        |        |        |        |        |
|--------------|---------------------|--------|--------|--------|--------|--------|--------|
| <i>BAM2</i>  | <i>HU03G02053.1</i> | 3.09   | 0.4    | 0      | 9.6    | 0      | 0      |
| <i>BAM3</i>  | <i>HU04G00443.1</i> | 9.08   | 2.36   | 2.17   | 17.96  | 2.96   | 1.88   |
| <i>BAM4</i>  | <i>HU04G00659.1</i> | 11.07  | 15.76  | 25.91  | 5.14   | 12.22  | 10.96  |
| <i>BAM5</i>  | <i>HU05G00342.1</i> | 1.43   | 2.91   | 3.68   | 0.82   | 3.08   | 2.93   |
| <i>BAM6</i>  | <i>HU07G00441.1</i> | 5.67   | 2.67   | 4.73   | 2.36   | 1.52   | 3.56   |
| <i>BAM7</i>  | <i>HU08G00306.1</i> | 7.01   | 11.06  | 6.13   | 6.53   | 9.31   | 7      |
| <i>BAM8</i>  | <i>HU09G00508.1</i> | 0.19   | 0      | 0      | 0      | 0      | 0      |
| <i>BAM9</i>  | <i>HU09G01694.1</i> | 0      | 0      | 0      | 0      | 0      | 0      |
| <i>BAM10</i> | <i>HU10G00777.1</i> | 118.01 | 716.89 | 355.9  | 119.42 | 277.19 | 187.61 |
| <i>BAM11</i> | <i>HU10G00778.1</i> | 31.2   | 67.58  | 55.74  | 26.13  | 75.23  | 51.72  |
| <i>BAM12</i> | <i>HU10G00833.1</i> | 146.49 | 629.91 | 247.03 | 182.11 | 260.99 | 200.17 |
| <i>BAM13</i> | <i>HU11G01792.1</i> | 9.46   | 10.69  | 7.48   | 1.32   | 10.6   | 10.89  |
| <i>BAM14</i> | <i>HU11G01794.1</i> | 8.99   | 10.12  | 8.06   | 9.02   | 10.4   | 10.84  |

#### 4-alpha-glucanotransferase

|             |                     |       |       |       |       |       |       |
|-------------|---------------------|-------|-------|-------|-------|-------|-------|
| <i>DPE1</i> | <i>HU09G01260.1</i> | 11.66 | 28.02 | 12.14 | 10.49 | 22.64 | 21.32 |
| <i>DPE2</i> | <i>HU09G01976.1</i> | 4.62  | 1.46  | 1.78  | 0.72  | 1.68  | 1.39  |
| <i>DPE3</i> | <i>HU09G01977.1</i> | 2.35  | 1.14  | 0.82  | 1.18  | 1.71  | 1.46  |
| <i>DPE4</i> | <i>HU10G01164.1</i> | 29.09 | 24.17 | 15.91 | 28.99 | 37.07 | 37.2  |

#### Glucan, water dikinase

|             |                     |       |       |       |       |       |       |
|-------------|---------------------|-------|-------|-------|-------|-------|-------|
| <i>GWD1</i> | <i>HU01G01312.1</i> | 39.35 | 47.53 | 61.78 | 0     | 0     | 0     |
| <i>GWD2</i> | <i>HU02G00177.1</i> | 28.76 | 51.71 | 24.07 | 16.49 | 69.88 | 60.45 |
| <i>GWD3</i> | <i>HU0G00205.1</i>  | 2.72  | 8.4   | 12.69 | 7.38  | 6.07  | 4.92  |
| <i>GWD4</i> | <i>HU10G00183.1</i> | 17    | 47.68 | 32.45 | 1.53  | 7.98  | 14.5  |

#### Phosphoglucomutase

|             |                     |       |       |       |       |       |       |
|-------------|---------------------|-------|-------|-------|-------|-------|-------|
| <i>PGM1</i> | <i>HU02G01892.1</i> | 15.49 | 18.08 | 15.74 | 19.89 | 37.96 | 30.94 |
| <i>PGM2</i> | <i>HU09G00757.1</i> | 29.33 | 47.97 | 35.85 | 14.85 | 32.63 | 38.5  |
| <i>PGM3</i> | <i>HU10G00720.1</i> | 13.27 | 13.25 | 15.56 | 10.88 | 15.77 | 15.3  |
| <i>PGM4</i> | <i>HU10G00736.1</i> | 30.72 | 18.75 | 18.22 | 10.86 | 27.99 | 25.43 |

#### Glucan phosphorylase

|                               |                     |       |        |        |       |        |        |
|-------------------------------|---------------------|-------|--------|--------|-------|--------|--------|
| <i>PHS1</i>                   | <i>HU02G00384.1</i> | 21.33 | 3.81   | 7.97   | 5.41  | 6.11   | 8.15   |
| <i>PHS2</i>                   | <i>HU06G01230.1</i> | 60.24 | 140.56 | 80.34  | 29.64 | 338.64 | 210.85 |
| <i>PHS3</i>                   | <i>HU06G01231.1</i> | 73.35 | 209.78 | 109.27 | 42.98 | 374.6  | 273.23 |
| <i>PHS4</i>                   | <i>HU07G02193.1</i> | 42.73 | 82.33  | 50.14  | 19.11 | 150.08 | 115.6  |
| Phosphoglucan, water dikinase |                     |       |        |        |       |        |        |
| <i>PWD1</i>                   | <i>HU09G02021.1</i> | 16.79 | 44.53  | 34.75  | 10.33 | 24.01  | 32.25  |
| <i>PWD2</i>                   | <i>HU09G02105.1</i> | 1.81  | 5.13   | 4.37   | 3.35  | 9.24   | 9.78   |
| Starch synthase               |                     |       |        |        |       |        |        |
| <i>StSy1</i>                  | <i>HU02G03120.1</i> | 18.3  | 15.84  | 15.87  | 16.13 | 14.04  | 15.85  |
| <i>StSy2</i>                  | <i>HU05G01186.1</i> | 24.34 | 35.77  | 28.49  | 8.42  | 14.06  | 13.16  |
| <i>StSy3</i>                  | <i>HU05G01187.1</i> | 38.95 | 57.58  | 46.68  | 20.36 | 31.67  | 20.99  |
| <i>StSy4</i>                  | <i>HU05G02284.1</i> | 13.98 | 12.78  | 11.62  | 6.24  | 10.92  | 12.19  |
| <i>StSy5</i>                  | <i>HU06G02646.1</i> | 10.56 | 18.33  | 10.32  | 6.94  | 12.34  | 12.98  |
| <i>StSy6</i>                  | <i>HU07G01224.1</i> | 17.25 | 20.69  | 18.86  | 15.4  | 24.95  | 24.71  |
| <i>StSy7</i>                  | <i>HU09G00010.1</i> | 3.16  | 0.73   | 0      | 1.73  | 0      | 0      |
| <i>StSy8</i>                  | <i>HU10G00589.1</i> | 45.6  | 51.86  | 15.35  | 46.61 | 101.75 | 90.26  |
| <i>StSy9</i>                  | <i>HU10G01954.1</i> | 2.15  | 1.83   | 1.33   | 2     | 2.88   | 3.83   |
| <i>StSy10</i>                 | <i>HU10G01957.1</i> | 4.69  | 4.86   | 4.47   | 2.67  | 4.9    | 5.32   |

---

Table S6 Correlation analyses between the starch contents or total soluble sugar and expression patterns of candidate genes in ‘WCHL’ and ‘YCHL’ pitayas.

| Gene names   | Gene ID             | Starch   |
|--------------|---------------------|----------|
| <i>AGL7</i>  | <i>HU03G01386.1</i> | -0.406   |
| <i>AGL8</i>  | <i>HU05G00176.1</i> | -0.655** |
| <i>AGPS1</i> | <i>HU01G00286.1</i> | -0.379   |
| <i>AGPS2</i> | <i>HU03G00147.1</i> | 0.890**  |
| <i>AGPS3</i> | <i>HU03G02063.1</i> | 0.213    |
| <i>AGPS5</i> | <i>HU07G00703.1</i> | 0.522*   |
| <i>AMY6</i>  | <i>HU02G00293.1</i> | -0.689** |
| <i>AMY7</i>  | <i>HU02G01323.1</i> | -0.832** |
| <i>BAM10</i> | <i>HU10G00777.1</i> | -0.520*  |
| <i>BAM12</i> | <i>HU10G00833.1</i> | -0.426   |
| <i>DPE1</i>  | <i>HU09G01260.1</i> | -0.578*  |
| <i>DPE2</i>  | <i>HU09G01976.1</i> | 0.101    |
| <i>DPE3</i>  | <i>HU09G01977.1</i> | 0.18     |
| <i>DPE4</i>  | <i>HU10G01164.1</i> | 0.072    |
| <i>GWD1</i>  | <i>HU01G01312.1</i> | -0.29    |
| <i>GWD2</i>  | <i>HU02G00177.1</i> | -0.589*  |
| <i>GWD3</i>  | <i>HU0G00205.1</i>  | -0.162   |
| <i>GWD4</i>  | <i>HU10G00183.1</i> | -0.550*  |
| <i>PGM1</i>  | <i>HU02G01892.1</i> | -0.291   |
| <i>PGM2</i>  | <i>HU09G00757.1</i> | -0.835** |
| <i>PGM3</i>  | <i>HU10G00720.1</i> | -0.246   |
| <i>PGM4</i>  | <i>HU10G00736.1</i> | -0.221   |
| <i>PHS1</i>  | <i>HU02G00384.1</i> | 0.278    |
| <i>PHS2</i>  | <i>HU06G01230.1</i> | -0.587*  |
| <i>PHS3</i>  | <i>HU06G01231.1</i> | -0.636** |
| <i>PHS4</i>  | <i>HU07G02193.1</i> | -0.651** |
| <i>PWD1</i>  | <i>HU09G02021.1</i> | -0.793** |
| <i>PWD2</i>  | <i>HU09G02105.1</i> | -0.439   |
| <i>StSy2</i> | <i>HU05G01186.1</i> | -0.436   |
| <i>StSy3</i> | <i>HU05G01187.1</i> | -0.401   |
| <i>StSy6</i> | <i>HU07G01224.1</i> | -0.517*  |
| <i>StSy8</i> | <i>HU10G00589.1</i> | -0.205   |

Table S7 The transcript abundance of genes related to major sugar biosynthesis pathways in ‘WCHL’ and ‘YCHL’ pitayas.

| Gene names   | Gene ID             | ‘WCHL’ pitaya |       |        | ‘YCHL’ pitaya |        |        |
|--------------|---------------------|---------------|-------|--------|---------------|--------|--------|
|              |                     | 17 d          | 25 d  | 29 d   | 35 d          | 65 d   | 75 d   |
| Fructokinase |                     |               |       |        |               |        |        |
| <i>FRK1</i>  | <i>HU02G00407.1</i> | 10.97         | 10.51 | 13.56  | 10.63         | 11     | 19.75  |
| <i>FRK2</i>  | <i>HU02G00410.1</i> | 0.49          | 0.18  | 1.19   | 0.27          | 0.32   | 0.83   |
| <i>FRK3</i>  | <i>HU02G00412.1</i> | 0.39          | 0.28  | 0.34   | 1.88          | 0.87   | 1.23   |
| <i>FRK4</i>  | <i>HU02G01173.1</i> | 14.8          | 27.63 | 35.05  | 5.41          | 18.75  | 24.92  |
| <i>FRK5</i>  | <i>HU02G01891.1</i> | 113.54        | 19.18 | 23.79  | 22.62         | 9.19   | 16.56  |
| <i>FRK6</i>  | <i>HU02G03173.1</i> | 5.05          | 3.12  | 2.53   | 0.83          | 0.58   | 1.12   |
| <i>FRK7</i>  | <i>HU02G03267.1</i> | 3.03          | 0.55  | 0      | 20.62         | 4.53   | 10.88  |
| <i>FRK8</i>  | <i>HU05G01760.1</i> | 9.48          | 2.1   | 4.12   | 12.37         | 9.04   | 8.98   |
| <i>FRK9</i>  | <i>HU06G02152.1</i> | 271.62        | 33.4  | 24.63  | 235.29        | 73.1   | 42.2   |
| <i>FRK10</i> | <i>HU06G02213.1</i> | 171.04        | 124.8 | 122.54 | 240.79        | 321.37 | 323.58 |
| <i>FRK11</i> | <i>HU07G01671.1</i> | 0             | 0     | 0      | 0             | 0      | 0.09   |
| Hexokinase   |                     |               |       |        |               |        |        |
| <i>HXK1</i>  | <i>HU01G00828.1</i> | 28.98         | 6.16  | 2.64   | 6.68          | 1.35   | 1.38   |
| <i>HXK2</i>  | <i>HU02G01230.1</i> | 6.26          | 1.87  | 5.67   | 14.24         | 14.24  | 18.24  |
| <i>HXK3</i>  | <i>HU02G01231.1</i> | 4.01          | 5.6   | 14.36  | 0.85          | 3.52   | 7      |
| <i>HXK4</i>  | <i>HU03G01733.1</i> | 6.03          | 8.83  | 13.04  | 8.36          | 5.02   | 5.95   |
| <i>HXK5</i>  | <i>HU03G02729.1</i> | 28.13         | 36.44 | 21.24  | 31.02         | 44.5   | 32.77  |
| <i>HXK6</i>  | <i>HU05G00008.1</i> | 12.06         | 10.64 | 14.91  | 3.79          | 4.77   | 4.29   |
| <i>HXK7</i>  | <i>HU06G00308.1</i> | 0.07          | 0     | 0      | 0.57          | 2.1    | 1.26   |
| <i>HXK8</i>  | <i>HU08G00363.1</i> | 2.86          | 6.13  | 17.46  | 2.82          | 9.21   | 17.44  |
| <i>HXK9</i>  | <i>HU08G01226.1</i> | 6.67          | 31.06 | 46.67  | 13.27         | 15.69  | 29.31  |
| <i>HXK10</i> | <i>HU0G00093.1</i>  | 0             | 0.15  | 0.14   | 0.5           | 1.47   | 1.15   |
| <i>HXK11</i> | <i>HU0G00094.1</i>  | 1             | 0     | 1.85   | 0             | 1.16   | 3.34   |
| <i>HXK12</i> | <i>HU11G00500.1</i> | 42.44         | 35.63 | 19.52  | 45.91         | 34.39  | 25.44  |

## Invertase

|              |                     |       |       |       |       |       |       |
|--------------|---------------------|-------|-------|-------|-------|-------|-------|
| <i>Ivr1</i>  | <i>HU01G00073.1</i> | 0     | 0     | 0     | 0     | 0     | 0     |
| <i>Ivr2</i>  | <i>HU01G00074.1</i> | 0     | 0     | 0     | 0     | 0.12  | 0     |
| <i>Ivr3</i>  | <i>HU02G01252.1</i> | 29.19 | 20.81 | 23.08 | 20.24 | 12.11 | 12.04 |
| <i>Ivr4</i>  | <i>HU03G00349.1</i> | 80.56 | 21.89 | 14.64 | 27.68 | 7.28  | 5.84  |
| <i>Ivr5</i>  | <i>HU03G00845.1</i> | 3.36  | 3.09  | 4.04  | 2.37  | 4.19  | 4.04  |
| <i>Ivr6</i>  | <i>HU03G01461.1</i> | 29.78 | 11.53 | 32.53 | 20.73 | 42.48 | 39.5  |
| <i>Ivr7</i>  | <i>HU03G02454.1</i> | 1.05  | 0     | 0.11  | 0     | 0.14  | 0     |
| <i>Ivr8</i>  | <i>HU03G02455.1</i> | 0.68  | 0.15  | 0     | 2.59  | 0     | 0.11  |
| <i>Ivr9</i>  | <i>HU03G02456.1</i> | 0.05  | 0     | 0     | 0     | 0.25  | 0.72  |
| <i>Ivr10</i> | <i>HU03G02457.1</i> | 1.71  | 1.78  | 1.69  | 41.92 | 19.49 | 27.16 |
| <i>Ivr11</i> | <i>HU04G00751.1</i> | 0.07  | 0     | 0     | 0     | 0     | 0     |
| <i>Ivr12</i> | <i>HU04G00755.1</i> | 0     | 0     | 0     | 0     | 0     | 0     |
| <i>Ivr13</i> | <i>HU05G00322.1</i> | 0     | 0     | 0     | 0     | 0     | 0     |
| <i>Ivr14</i> | <i>HU07G00113.1</i> | 0.06  | 0     | 0     | 0     | 0     | 0     |
| <i>Ivr15</i> | <i>HU07G00148.1</i> | 0.79  | 0     | 0     | 0     | 0     | 0     |
| <i>Ivr16</i> | <i>HU07G00250.1</i> | 18.28 | 17.17 | 18.8  | 16.75 | 12.69 | 11.33 |
| <i>Ivr17</i> | <i>HU07G00349.1</i> | 7.97  | 0.95  | 0.77  | 0.42  | 0     | 0     |
| <i>Ivr18</i> | <i>HU07G02013.1</i> | 0.04  | 0.67  | 0.3   | 0.64  | 0.74  | 0.77  |
| <i>Ivr19</i> | <i>HU07G02022.1</i> | 0.28  | 0.72  | 1.14  | 1.57  | 2.13  | 1.42  |
| <i>Ivr20</i> | <i>HU08G00679.1</i> | 18.92 | 32.39 | 27.19 | 18.86 | 16.86 | 19.31 |
| <i>Ivr21</i> | <i>HU08G01394.1</i> | 2.38  | 0.88  | 2.27  | 0.17  | 0.81  | 0.92  |
| <i>Ivr22</i> | <i>HU08G01398.1</i> | 0     | 0     | 0     | 0     | 0     | 0     |
| <i>Ivr23</i> | <i>HU11G00399.1</i> | 2.36  | 0     | 0.41  | 13.61 | 2.96  | 2.02  |
| <i>Ivr24</i> | <i>HU11G01556.1</i> | 12.94 | 7.29  | 4.22  | 5.79  | 4.44  | 3.78  |
| <i>Ivr25</i> | <i>HU11G01647.1</i> | 0.14  | 0.9   | 0.07  | 0     | 0.05  | 0     |
| <i>Ivr26</i> | <i>HU11G01656.1</i> | 0     | 0     | 0     | 0     | 0     | 0     |
| <i>Ivr27</i> | <i>HU11G01657.1</i> | 0.87  | 0     | 0     | 1.43  | 0     | 0     |

### Glucose-6-phosphate isomerase

|             |                     |       |       |       |       |       |       |
|-------------|---------------------|-------|-------|-------|-------|-------|-------|
| <i>PGI1</i> | <i>HU01G02580.1</i> | 2.13  | 1.45  | 0.28  | 1.39  | 2.2   | 1.01  |
| <i>PGI2</i> | <i>HU01G02694.1</i> | 5.57  | 8.04  | 10.2  | 18.69 | 5.49  | 11.6  |
| <i>PGI3</i> | <i>HU04G01930.1</i> | 0.57  | 1.1   | 2.93  | 1.05  | 0.2   | 0.31  |
| <i>PGI4</i> | <i>HU05G00170.1</i> | 52.99 | 50.53 | 37.64 | 37.41 | 42.92 | 31.51 |
| <i>PGI5</i> | <i>HU05G00393.1</i> | 3.29  | 1.42  | 0.6   | 2.09  | 2.13  | 2.71  |
| <i>PGI6</i> | <i>HU07G00352.1</i> | 10.42 | 7.38  | 7.44  | 5.27  | 8.79  | 9.15  |
| <i>PGI7</i> | <i>HU07G00362.1</i> | 2.54  | 6.62  | 3.88  | 2.13  | 4.54  | 3     |
| <i>PGI8</i> | <i>HU07G01113.1</i> | 14.88 | 17.14 | 17.81 | 15.86 | 19.27 | 16.26 |

### Sucrose-phosphate synthase

|             |                     |       |       |       |       |       |       |
|-------------|---------------------|-------|-------|-------|-------|-------|-------|
| <i>SPS1</i> | <i>HU03G00894.1</i> | 20.77 | 27.66 | 15.06 | 20.59 | 21.48 | 24.69 |
| <i>SPS2</i> | <i>HU05G00771.1</i> | 58.92 | 42.4  | 51.66 | 50.28 | 78.01 | 77.51 |
| <i>SPS3</i> | <i>HU09G02070.1</i> | 0.06  | 0.02  | 0.02  | 0     | 0     | 0     |
| <i>SPS4</i> | <i>HU11G00237.1</i> | 20.08 | 25.17 | 16.84 | 2.78  | 10.12 | 9.76  |

### Sucrose synthase

|               |                     |        |        |        |        |        |        |
|---------------|---------------------|--------|--------|--------|--------|--------|--------|
| <i>SuSy1</i>  | <i>HU02G00890.1</i> | 50     | 296.75 | 109.37 | 117.09 | 258.88 | 236.68 |
| <i>SuSy2</i>  | <i>HU02G01574.1</i> | 4.58   | 17.4   | 0.35   | 3.48   | 0.14   | 0.48   |
| <i>SuSy3</i>  | <i>HU02G02087.1</i> | 9.65   | 11.78  | 12.71  | 7.95   | 11.97  | 16.78  |
| <i>SuSy4</i>  | <i>HU03G00958.1</i> | 1.71   | 3.24   | 4.83   | 0.88   | 2.57   | 3.25   |
| <i>SuSy5</i>  | <i>HU03G02498.1</i> | 146.58 | 4.67   | 3.9    | 130.53 | 2.26   | 1.96   |
| <i>SuSy6</i>  | <i>HU03G02967.1</i> | 28.37  | 53.1   | 33.85  | 8.47   | 9.62   | 9.13   |
| <i>SuSy7</i>  | <i>HU05G00839.1</i> | 13.21  | 19.9   | 18.85  | 7.55   | 13.29  | 12.64  |
| <i>SuSy8</i>  | <i>HU07G01441.1</i> | 10.82  | 55.53  | 57.16  | 3.61   | 6.03   | 6.63   |
| <i>SuSy9</i>  | <i>HU07G01442.1</i> | 6.11   | 24.03  | 33.17  | 2.77   | 3.4    | 4.45   |
| <i>SuSy10</i> | <i>HU08G01008.1</i> | 0.42   | 0.42   | 0.51   | 0.29   | 0      | 0      |
| <i>SuSy11</i> | <i>HU11G00421.1</i> | 353.84 | 33.53  | 62.84  | 83.81  | 26.09  | 21.84  |

---

Table S8 Correlation analyses between the main sugar contents and expression patterns of candidate gene in ‘WCHL’ and ‘YCHL’ pitayas.

| Gene names    | Gene ID             | Glucose  | Fructose | Sucrose  | Sorbitol | Galactose | Inositol |
|---------------|---------------------|----------|----------|----------|----------|-----------|----------|
| <i>FRK5</i>   | <i>HU02G01891.1</i> | -0.564*  | -0.616** | -0.356   | -0.394   | -0.444    | -0.296   |
| <i>FRK9</i>   | <i>HU06G02152.1</i> | -0.821** | -0.875** | -0.565*  | -0.642** | -0.777**  | -0.349   |
| <i>FRK10</i>  | <i>HU06G02213.1</i> | -0.321   | 0.199    | 0.546*   | -0.457   | -0.368    | 0.692**  |
| <i>HXK1</i>   | <i>HU01G00828.1</i> | -0.625** | -0.709** | -0.475*  | -0.473*  | -0.531*   | -0.337   |
| <i>HXK5</i>   | <i>HU03G02729.1</i> | -0.263   | 0.11     | 0.186    | -0.491*  | -0.387    | 0.646**  |
| <i>HXK9</i>   | <i>HU08G01226.1</i> | 0.796**  | 0.593**  | 0.254    | 0.766**  | 0.817**   | -0.106   |
| <i>HXK12</i>  | <i>HU11G00500.1</i> | -0.741** | -0.783** | -0.610** | -0.698** | -0.751**  | -0.217   |
| <i>Ivr4</i>   | <i>HU03G00349.1</i> | -0.600** | -0.731** | -0.514*  | -0.428   | -0.510*   | -0.406   |
| <i>Ivr6</i>   | <i>HU03G01461.1</i> | -0.025   | 0.225    | 0.442    | 0.004    | -0.01     | 0.325    |
| <i>Ivr10</i>  | <i>HU03G02457.1</i> | -0.321   | -0.168   | 0.053    | -0.327   | -0.361    | 0.117    |
| <i>Ivr20</i>  | <i>HU08G00679.1</i> | 0.587*   | 0.201    | -0.22    | 0.561*   | 0.600**   | -0.378   |
| <i>PGI4</i>   | <i>HU05G00170.1</i> | -0.278   | -0.389   | -0.455   | -0.277   | -0.286    | -0.148   |
| <i>SPS1</i>   | <i>HU03G00894.1</i> | -0.126   | -0.04    | -0.06    | -0.311   | -0.151    | 0.156    |
| <i>SPS2</i>   | <i>HU05G00771.1</i> | -0.166   | 0.385    | 0.718**  | -0.322   | -0.183    | 0.765**  |
| <i>SPS4</i>   | <i>HU11G00237.1</i> | 0.282    | 0.066    | -0.215   | 0.258    | 0.328     | -0.2     |
| <i>SuSy1</i>  | <i>HU02G00890.1</i> | 0.284    | 0.454    | 0.295    | 0.021    | 0.186     | 0.434    |
| <i>SuSy5</i>  | <i>HU03G02498.1</i> | -0.761** | -0.908** | -0.642** | -0.569*  | -0.699**  | -0.495*  |
| <i>SuSy11</i> | <i>HU11G00421.1</i> | -0.607** | -0.666** | -0.396   | -0.426   | -0.496*   | -0.316   |



Table S9 The transcript abundance of genes related to TCA cycle pathways in ‘WCHL’ and ‘YCHL’ pitayas.

| Gene names                                      | Gene ID             | ‘WCHL’ pitaya |        |       | ‘YCHL’ pitaya |        |       |
|-------------------------------------------------|---------------------|---------------|--------|-------|---------------|--------|-------|
|                                                 |                     | 17 d          | 25 d   | 29 d  | 35 d          | 65 d   | 75 d  |
| Aconitate hydratase                             |                     |               |        |       |               |        |       |
| <i>ACO1</i>                                     | <i>HU01G01718.1</i> | 35.63         | 84.96  | 54.41 | 47.16         | 70.54  | 63.8  |
| <i>ACO2</i>                                     | <i>HU01G01740.1</i> | 25.97         | 57.35  | 28.71 | 11.55         | 25.87  | 18.51 |
| <i>ACO3</i>                                     | <i>HU08G00194.1</i> | 21.99         | 30.09  | 20.84 | 26.33         | 27.45  | 32.12 |
| 2-isopropylmalate synthase                      |                     |               |        |       |               |        |       |
| <i>CMS1</i>                                     | <i>HU01G02605.1</i> | 173.29        | 0.89   | 0.89  | 4.33          | 0      | 0     |
| <i>CMS2</i>                                     | <i>HU06G01828.1</i> | 22.46         | 32.57  | 28.19 | 7.79          | 16.09  | 14.98 |
| <i>CMS3</i>                                     | <i>HU08G00711.1</i> | 67.82         | 32.98  | 22.81 | 31.18         | 15.46  | 10.87 |
| Citrate synthase                                |                     |               |        |       |               |        |       |
| <i>CS1</i>                                      | <i>HU01G00929.1</i> | 153.83        | 130.68 | 65.25 | 80.49         | 120.89 | 90.4  |
| <i>CS2</i>                                      | <i>HU02G00183.1</i> | 53.36         | 6.07   | 7.12  | 8.69          | 12.68  | 7.84  |
| <i>CS3</i>                                      | <i>HU02G03260.1</i> | 22.37         | 24.66  | 21.63 | 17.04         | 14.58  | 13.29 |
| <i>CS4</i>                                      | <i>HU03G01582.1</i> | 62.81         | 46.63  | 39.22 | 37.82         | 42.27  | 39.99 |
| <i>CS5</i>                                      | <i>HU04G00898.1</i> | 0.31          | 1.11   | 0.92  | 0             | 9.98   | 10.05 |
| <i>CS6</i>                                      | <i>HU06G02202.1</i> | 88.34         | 29.9   | 32.27 | 48.52         | 36.3   | 24.6  |
| <i>CS7</i>                                      | <i>HU07G00576.1</i> | 0             | 0      | 0     | 0             | 0      | 0     |
| <i>CS8</i>                                      | <i>HU07G00635.1</i> | 0.86          | 0.63   | 0.27  | 0.23          | 0.16   | 0.15  |
| <i>CS9</i>                                      | <i>HU07G01303.1</i> | 11.49         | 15.74  | 14.41 | 33.19         | 12.33  | 20.86 |
| <i>CS10</i>                                     | <i>HU08G00662.1</i> | 59.65         | 48.16  | 29.09 | 46.04         | 53.3   | 42.8  |
| <i>CS11</i>                                     | <i>HU08G01468.1</i> | 7.52          | 0.55   | 0.17  | 11.63         | 2.03   | 1.9   |
| <i>CS12</i>                                     | <i>HU10G00190.1</i> | 97.88         | 10.18  | 3.46  | 30.99         | 12.43  | 6.87  |
| <i>CS13</i>                                     | <i>HU11G01933.1</i> | 0.43          | 0      | 0     | 1.08          | 0      | 0     |
| <i>CS14</i>                                     | <i>HU11G01978.1</i> | 0             | 0      | 0     | 0.34          | 0      | 0     |
| Dihydrolipoyllysine-residue succinyltransferase |                     |               |        |       |               |        |       |
| <i>DLST1</i>                                    | <i>HU01G01093.1</i> | 0.34          | 0.2    | 0.59  | 0             | 0      | 0     |
| <i>DLST2</i>                                    | <i>HU08G00217.1</i> | 0.76          | 0.49   | 1.79  | 1.37          | 1.25   | 0.82  |

|                                        |                     |        |        |        |        |        |        |
|----------------------------------------|---------------------|--------|--------|--------|--------|--------|--------|
| <i>DLST3</i>                           | <i>HU10G01974.1</i> | 74.68  | 106.46 | 84.94  | 78.33  | 95.45  | 78.05  |
| <b>Enolase</b>                         |                     |        |        |        |        |        |        |
| <i>Eno1</i>                            | <i>HU02G01933.1</i> | 0      | 0.19   | 0.15   | 4.56   | 8.97   | 7.68   |
| <i>Eno2</i>                            | <i>HU04G01426.1</i> | 73.53  | 10.45  | 13.18  | 27.58  | 21.15  | 17.49  |
| <i>Eno3</i>                            | <i>HU07G02203.1</i> | 22.9   | 16.26  | 17.92  | 27.08  | 21.53  | 22.65  |
| <i>Eno4</i>                            | <i>HU09G00620.1</i> | 285.93 | 309.69 | 100.97 | 144.21 | 276.51 | 271.38 |
| <i>Eno5</i>                            | <i>HU09G00621.1</i> | 623.52 | 201.32 | 132.05 | 315.07 | 181.19 | 174.38 |
| <b>Fumarate hydratase</b>              |                     |        |        |        |        |        |        |
| <i>FUM1</i>                            | <i>HU02G00881.1</i> | 42.42  | 25.84  | 29.08  | 42.32  | 44.18  | 43.09  |
| <i>FUM2</i>                            | <i>HU06G01498.1</i> | 31.19  | 33.24  | 27.3   | 20.55  | 23.94  | 26.85  |
| <b>Malate dehydrogenase</b>            |                     |        |        |        |        |        |        |
| <i>MDH1</i>                            | <i>HU06G02301.1</i> | 482.2  | 174.33 | 152.57 | 467.01 | 425.44 | 397.99 |
| <i>MDH2</i>                            | <i>HU07G00587.1</i> | 13.47  | 1.7    | 0.69   | 28.87  | 2.19   | 3.01   |
| <i>MDH3</i>                            | <i>HU11G01942.1</i> | 1.17   | 0      | 0      | 0.85   | 0.29   | 0.54   |
| <i>MDH4</i>                            | <i>HU11G01943.1</i> | 0.56   | 0      | 0      | 0.39   | 0.39   | 0.99   |
| <b>2-oxoglutarate dehydrogenase</b>    |                     |        |        |        |        |        |        |
| <i>OGDH1</i>                           | <i>HU01G01093.1</i> | 0.34   | 0.2    | 0.59   | 0      | 0      | 0      |
| <i>OGDH2</i>                           | <i>HU01G02567.1</i> | 15.67  | 18.05  | 36.54  | 5.6    | 37.22  | 45.16  |
| <i>OGDH3</i>                           | <i>HU04G02070.1</i> | 58.94  | 92.45  | 77.58  | 38.57  | 45.66  | 37.77  |
| <i>OGDH4</i>                           | <i>HU06G01674.1</i> | 0.42   | 0.96   | 0.3    | 0.07   | 1.17   | 2.67   |
| <i>OGDH5</i>                           | <i>HU08G00217.1</i> | 0.76   | 0.49   | 1.79   | 1.37   | 1.25   | 0.82   |
| <i>OGDH6</i>                           | <i>HU10G01974.1</i> | 74.68  | 106.46 | 84.94  | 78.33  | 95.45  | 78.05  |
| <b>Pyruvate dehydrogenase</b>          |                     |        |        |        |        |        |        |
| <i>PDH1</i>                            | <i>HU02G00259.1</i> | 0.82   | 0.06   | 0.5    | 2.62   | 4.11   | 3.29   |
| <i>PDH2</i>                            | <i>HU02G02870.1</i> | 24.87  | 32.76  | 34.45  | 28.84  | 35.09  | 33.3   |
| <i>PDH3</i>                            | <i>HU07G00191.1</i> | 109.24 | 35.16  | 25.44  | 39.63  | 19.4   | 21.42  |
| <i>PDH4</i>                            | <i>HU10G00282.1</i> | 99.89  | 58.41  | 43.15  | 48.42  | 52.11  | 43.38  |
| <b>Phosphoenolpyruvate carboxylase</b> |                     |        |        |        |        |        |        |
| <i>PEPC1</i>                           | <i>HU01G00450.1</i> | 0.88   | 0      | 0      | 0      | 0      | 0      |
| <i>PEPC2</i>                           | <i>HU01G00894.1</i> | 25.5   | 51.62  | 21.3   | 15.52  | 58.34  | 56.87  |

|               |                     |        |        |        |        |        |        |
|---------------|---------------------|--------|--------|--------|--------|--------|--------|
| <i>PEPC3</i>  | <i>HU01G00987.1</i> | 5.88   | 170.05 | 43.39  | 4.45   | 620.03 | 513.18 |
| <i>PEPC4</i>  | <i>HU01G00988.1</i> | 2.9    | 86.75  | 22.02  | 3.08   | 314.72 | 315.79 |
| <i>PEPC5</i>  | <i>HU01G00989.1</i> | 0.57   | 2.35   | 3.06   | 0.1    | 0.88   | 0.72   |
| <i>PEPC6</i>  | <i>HU01G00990.1</i> | 2.88   | 2.27   | 1.77   | 39.71  | 72.07  | 48.41  |
| <i>PEPC7</i>  | <i>HU01G00991.1</i> | 13.77  | 7.7    | 21.5   | 104.68 | 24.4   | 14.17  |
| <i>PEPC8</i>  | <i>HU02G00490.1</i> | 1.96   | 1.7    | 1.51   | 0.08   | 0.19   | 0.19   |
| <i>PEPC9</i>  | <i>HU02G02553.1</i> | 1.49   | 0.7    | 0.81   | 0.57   | 0.37   | 0.37   |
| <i>PEPC10</i> | <i>HU02G02555.1</i> | 0.1    | 0      | 0.05   | 1.08   | 0.78   | 0.26   |
| <i>PEPC11</i> | <i>HU02G02556.1</i> | 4.74   | 3.1    | 3.57   | 1.17   | 1.58   | 2.08   |
| <i>PEPC12</i> | <i>HU02G03351.1</i> | 0.06   | 0.63   | 0.91   | 0.21   | 0.79   | 0      |
| <i>PEPC13</i> | <i>HU03G01008.1</i> | 102.25 | 181.3  | 125.63 | 120.33 | 35.27  | 21.17  |
| <i>PEPC14</i> | <i>HU03G01874.1</i> | 295.76 | 93.13  | 87.12  | 103.75 | 116.19 | 103.5  |
| <i>PEPC15</i> | <i>HU04G00337.1</i> | 0      | 0      | 0      | 0      | 0      | 0      |
| <i>PEPC16</i> | <i>HU08G01056.1</i> | 42.11  | 11.62  | 9.38   | 104.78 | 7.23   | 4.34   |
| <i>PEPC17</i> | <i>HU08G02244.1</i> | 5.42   | 1.96   | 3.23   | 2.36   | 3.35   | 2.95   |
| <i>PEPC18</i> | <i>HU09G00446.1</i> | 0      | 0      | 0      | 0      | 0      | 0      |
| <i>PEPC19</i> | <i>HU09G00447.1</i> | 0      | 0      | 0      | 0      | 0.36   | 0      |
| <i>PEPC20</i> | <i>HU09G01073.1</i> | 9.35   | 8.03   | 8.83   | 5.07   | 6.49   | 8.11   |
| <i>PEPC21</i> | <i>HU10G01889.1</i> | 0.05   | 0      | 0      | 0      | 0      | 0      |
| <i>PEPC22</i> | <i>HU10G01890.1</i> | 0.74   | 0.25   | 0.05   | 0.03   | 0      | 0      |
| <i>PEPC23</i> | <i>HU10G02036.1</i> | 0.04   | 0      | 0      | 0      | 0      | 0      |
| <i>PEPC24</i> | <i>HU10G02037.1</i> | 0.19   | 0.08   | 0      | 0      | 0      | 0      |

#### Phosphoenolpyruvate carboxykinase

|              |                     |      |       |       |      |      |       |
|--------------|---------------------|------|-------|-------|------|------|-------|
| <i>PEPCK</i> | <i>HU10G00784.1</i> | 3.51 | 92.48 | 36.01 | 0.31 | 9.23 | 14.93 |
|--------------|---------------------|------|-------|-------|------|------|-------|

#### Phosphoglycerate kinase

|             |                     |       |       |       |       |       |       |
|-------------|---------------------|-------|-------|-------|-------|-------|-------|
| <i>PGK1</i> | <i>HU03G02104.1</i> | 69.42 | 40.4  | 34.77 | 17.24 | 9.99  | 12.27 |
| <i>PGK2</i> | <i>HU03G02313.1</i> | 6.06  | 4.5   | 7.25  | 4.8   | 5.79  | 7.91  |
| <i>PGK3</i> | <i>HU05G00547.1</i> | 23.81 | 20.02 | 24.91 | 10.42 | 35.89 | 34.58 |

|             |                     |        |        |        |        |        |        |
|-------------|---------------------|--------|--------|--------|--------|--------|--------|
| <i>PGK4</i> | <i>HU06G01772.1</i> | 546.86 | 359.49 | 135.71 | 397.25 | 366.86 | 338.26 |
| <i>PGK5</i> | <i>HU06G02389.1</i> | 13.51  | 15.17  | 9.66   | 8.49   | 14.74  | 12.14  |
| <i>PGK6</i> | <i>HU10G01770.1</i> | 7.56   | 8.18   | 10.63  | 2.86   | 1.81   | 1.64   |

#### Pyruvate kinase

|             |                     |        |        |       |        |        |       |
|-------------|---------------------|--------|--------|-------|--------|--------|-------|
| <i>PK1</i>  | <i>HU01G02685.1</i> | 0.68   | 0.67   | 2.01  | 1.1    | 0.38   | 0.44  |
| <i>PK2</i>  | <i>HU01G02786.1</i> | 0.31   | 0.21   | 0.66  | 0      | 0.07   | 0.13  |
| <i>PK3</i>  | <i>HU02G01707.1</i> | 37.2   | 22.1   | 24.03 | 13.33  | 11.08  | 12.62 |
| <i>PK4</i>  | <i>HU02G02411.1</i> | 65.91  | 51.51  | 28.16 | 57.65  | 61.36  | 57.94 |
| <i>PK5</i>  | <i>HU03G00827.1</i> | 53.4   | 7.82   | 3.55  | 40.42  | 46.3   | 38.4  |
| <i>PK6</i>  | <i>HU03G02352.1</i> | 164.91 | 107.49 | 70.4  | 105.15 | 101.53 | 93.18 |
| <i>PK7</i>  | <i>HU04G00494.1</i> | 37.08  | 3.89   | 2.86  | 10.51  | 4.44   | 2.76  |
| <i>PK8</i>  | <i>HU05G00291.1</i> | 40.26  | 6.56   | 11.17 | 23.65  | 13.01  | 16.2  |
| <i>PK9</i>  | <i>HU09G00466.1</i> | 84.95  | 57.56  | 39.68 | 38.22  | 40.14  | 39.74 |
| <i>PK10</i> | <i>HU09G00634.1</i> | 49.96  | 60.01  | 66.39 | 49.06  | 35.65  | 41.81 |
| <i>PK11</i> | <i>HU09G01922.1</i> | 29.1   | 9.26   | 5.64  | 18.85  | 17.56  | 14.8  |

#### Succinyl-CoA synthetase

|             |                     |       |       |       |       |       |       |
|-------------|---------------------|-------|-------|-------|-------|-------|-------|
| <i>SCS1</i> | <i>HU02G02193.1</i> | 51.55 | 36.82 | 36.58 | 70.71 | 71.57 | 60.29 |
| <i>SCS2</i> | <i>HU03G02309.1</i> | 61.28 | 32.26 | 40.91 | 60.23 | 47.14 | 44.04 |
| <i>SCS3</i> | <i>HU10G01334.1</i> | 55.71 | 48.42 | 40.46 | 52.02 | 62.17 | 46.27 |

#### Succinate dehydrogenase

|             |                     |       |       |       |       |       |       |
|-------------|---------------------|-------|-------|-------|-------|-------|-------|
| <i>SDH1</i> | <i>HU01G02379.1</i> | 6.11  | 8.27  | 13.87 | 6.76  | 5.93  | 5.11  |
| <i>SDH2</i> | <i>HU05G02019.1</i> | 78.08 | 60.99 | 54.24 | 64.92 | 80.64 | 65.92 |
| <i>SDH3</i> | <i>HU06G00028.1</i> | 0.93  | 3.96  | 1.22  | 0.18  | 2.25  | 2.71  |

---

Table S10 Correlation analyses between the main organic acid contents and expression patterns of candidate genes in ‘WCHL’ and ‘YCHL’ pitayas.

| <i>Gene names</i> | <i>Gene ID</i>      | Malic acid | Citric acid | Citromalic acid | Oxalic acid | Fumaric acid | Succinic acid |
|-------------------|---------------------|------------|-------------|-----------------|-------------|--------------|---------------|
| <i>ACO1</i>       | <i>HU01G01718.1</i> | 0.672**    | 0.35        | -0.433          | -0.560*     | -0.023       | 0.222         |
| <i>ACO2</i>       | <i>HU01G01740.1</i> | 0.827**    | -0.302      | 0.201           | -0.364      | .572*        | -0.001        |
| <i>ACO3</i>       | <i>HU08G00194.1</i> | 0.082      | 0.331       | -0.319          | -0.442      | -0.272       | 0.198         |
| <i>CMS1</i>       | <i>HU01G02605.1</i> | -          | -           | 0.948**         | -           | -            | -             |
| <i>CMS2</i>       | <i>HU06G01828.1</i> | -          | -           | 0.327           | -           | -            | -             |
| <i>CMS3</i>       | <i>HU08G00711.1</i> | -          | -           | 0.924**         | -           | -            | -             |
| <i>CS1</i>        | <i>HU01G00929.1</i> | -0.02      | -0.094      | -               | -0.139      | 0.477*       | 0.295         |
| <i>CS2</i>        | <i>HU02G00183.1</i> | -0.480*    | -0.368      | -               | 0.302       | 0.476*       | -0.007        |
| <i>CS4</i>        | <i>HU03G01582.1</i> | -0.118     | -0.376      | -               | 0.156       | 0.702**      | 0.174         |
| <i>CS6</i>        | <i>HU06G02202.1</i> | -0.459     | -0.431      | -               | 0.28        | 0.495*       | 0.077         |
| <i>CS10</i>       | <i>HU08G00662.1</i> | -0.307     | 0.14        | -               | -0.114      | 0.238        | 0.517*        |
| <i>CS12</i>       | <i>HU10G00190.1</i> | -0.507*    | -0.449      | -               | 0.316       | 0.480*       | 0.048         |
| <i>DLST1</i>      | <i>HU01G01093.1</i> | 0.312      | -0.626**    | -               | 0.146       | 0.631**      | -0.286        |
| <i>DLST2</i>      | <i>HU08G00217.1</i> | -0.085     | 0.043       | -               | 0.25        | -0.267       | -0.278        |
| <i>DLST3</i>      | <i>HU10G01974.1</i> | 0.611**    | 0.143       | -               | -0.252      | 0.025        | 0.029         |
| <i>Eno4</i>       | <i>HU09G00620.1</i> | 0.039      | 0.245       | 0.363           | -0.33       | 0.206        | 0.454         |
| <i>Eno5</i>       | <i>HU09G00621.1</i> | -0.471*    | -0.424      | 0.838**         | 0.316       | 0.458        | 0.071         |
| <i>FUM1</i>       | <i>HU02G00881.1</i> | -0.745**   | 0.504*      | -               | -0.032      | -0.297       | 0.524*        |
| <i>FUM2</i>       | <i>HU06G01498.1</i> | 0.252      | -0.367      | -               | -0.015      | 0.273        | -0.378        |
| <i>MDH1</i>       | <i>HU06G02301.1</i> | -0.762**   | 0.35        | -               | 0.053       | -0.195       | 0.487*        |
| <i>OGDH2</i>      | <i>HU01G02567.1</i> | -0.001     | 0.522*      | -               | -0.131      | -0.329       | -0.007        |
| <i>OGDH3</i>      | <i>HU04G02070.1</i> | 0.844**    | -0.577*     | -               | -0.112      | 0.689**      | -0.266        |
| <i>OGDH6</i>      | <i>HU06G01674.1</i> | -0.112     | 0.451       | -               | -0.212      | -0.418       | 0.024         |
| <i>PDH3</i>       | <i>HU07G00191.1</i> | -0.343     | -0.547*     | 0.892**         | 0.314       | 0.577*       | -0.037        |

|               |                     |          |          |         |        |         |          |
|---------------|---------------------|----------|----------|---------|--------|---------|----------|
| <i>PDH4</i>   | <i>HU10G00282.1</i> | -0.25    | -0.447   | 0.938** | 0.192  | 0.654** | 0.108    |
| <i>PEPC3</i>  | <i>HU01G00987.1</i> | -0.102   | 0.804**  | -0.431  | -0.468 | -0.499* | 0.375    |
| <i>PEPC4</i>  | <i>HU01G00988.1</i> | -0.143   | 0.768**  | -0.425  | -0.415 | -0.532* | 0.31     |
| <i>PEPC7</i>  | <i>HU01G00991.1</i> | -0.193   | -0.011   | -0.195  | -0.109 | -0.184  | 0.136    |
| <i>PEPC13</i> | <i>HU03G01008.1</i> | 0.529*   | -0.661** | 0.234   | 0.147  | 0.45    | -0.28    |
| <i>PEPC14</i> | <i>HU03G01874.1</i> | -0.482*  | -0.363   | 0.899** | 0.241  | 0.489*  | 0.055    |
| <i>PEPC16</i> | <i>HU08G01056.1</i> | -0.338   | -0.21    | 0.067   | 0.198  | -0.008  | 0.152    |
| <i>PEPCK</i>  | <i>HU10G00784.1</i> | 0.803**  | -0.288   | -0.044  | -0.131 | 0.346   | -0.226   |
| <i>PGK4</i>   | <i>HU06G01772.1</i> | -0.374   | -0.004   | 0.529*  | 0.037  | 0.202   | 0.351    |
| <i>PK6</i>    | <i>HU03G02352.1</i> | -0.331   | -0.258   | 0.815** | 0.171  | 0.518*  | 0.305    |
| <i>PK9</i>    | <i>HU09G00466.1</i> | -0.092   | -0.549*  | 0.937** | 0.126  | 0.706** | -0.014   |
| <i>SCS1</i>   | <i>HU02G02193.1</i> | -0.608** | 0.607**  | -       | -0.255 | -0.517* | 0.546*   |
| <i>SCS2</i>   | <i>HU03G02309.1</i> | -0.741** | -0.049   | -       | 0.367  | -0.096  | 0.072    |
| <i>SCS3</i>   | <i>HU10G01334.1</i> | -0.24    | 0.423    | -       | -0.378 | 0.104   | 0.746**  |
| <i>SDH1</i>   | <i>HU01G02379.1</i> | 0.314    | -0.324   | -       | 0.418  | -0.037  | -0.640** |
| <i>SDH2</i>   | <i>HU05G02019.1</i> | -0.357   | 0.325    | -       | -0.337 | 0.07    | 0.539*   |
| <i>SDH3</i>   | <i>HU06G00028.1</i> | 0.536*   | 0.243    | -       | -0.272 | 0.056   | 0.095    |
